# Supplementary material for: Acupuncture as an Independent or Adjuvant Management to Standard Care for Perimenopausal Depression: A Systematic Review and Meta-Analysis
Source: PubMed Central journal article supplement (PMC8192720; doi:10.3389/fpsyt.2021.666988), 2021-05-28

## Appendix

---

### Appendix 1. Search strategy

The following English search strategy was used for MEDLINE via PubMed while the Chinese one was used for SinoMed; both two search strategies were also suitable for other electronic databases:

#### Medline search strategy for English databases

| No. | Search terms                           |
|-----|----------------------------------------|
| 1   | acupuncture[MeSH Terms]                |
| 2   | acupuncture                            |
| 3   | electropuncture                        |
| 4   | manual acupuncture                     |
| 5   | auricular acupuncture                  |
| 6   | acupuncture point                      |
| 7   | acupoint                               |
| 8   | #1 or #2 or #3 or #4 or #5 or #6 or #7 |
| 9   | depression                             |
| 10  | depressive disorder                    |
| 11  | #9 or #10                              |
| 12  | climacteric                            |
| 13  | menopause                              |
| 14  | perimenopause                          |
| 15  | #12 or #13 or #14                      |
| 16  | #8 and #11 and #15                     |

#### Medline search strategy for Chinese database

| No. | Search terms                                  |
|-----|-----------------------------------------------|
| 1   | 随机对照试验                                        |
| 2   | 随机                                            |
| 3   | 对照                                            |
| 4   | (#3) OR (#2) OR (#1)                          |
| 5   | "针灸疗法"[不加权:扩展]                                |
| 6   | 针灸                                            |
| 7   | 电针                                            |
| 8   | 穴                                             |
| 9   | 手捻针                                           |
| 10  | 针                                             |
| 11  | (#10) OR (#9) OR (#8) OR (#7) OR (#6) OR (#5) |
| 12  | "抑郁症"[不加权:扩展]                                 |
| 13  | 抑郁                                            |
| 14  | 郁证                                            |
| 15  | 郁病                                            |
| 16  | (#15) OR (#14) OR (#13) OR (#12)              |

|    |                                    |
|----|------------------------------------|
| 17 | "更年期"[不加权:扩展]                      |
| 18 | 围绝经期                               |
| 19 | (#18) OR (#17)                     |
| 20 | (#19) AND (#16) AND (#11) AND (#4) |

 National Library of Medicine  
National Center for Biotechnology Information
fuqiang1207

### PubMed Advanced Search Builder


  
[User Guide](#)

Add terms to the query box

All Fields

Enter a search term

ADD

[Show Index](#)

Query box

Enter / edit your search query here

Add to History

#### History and Search Details

[Download](#)
 Delete

| Search | Actions | Details | Query                                          | Results | Time     |
|--------|---------|---------|------------------------------------------------|---------|----------|
| #16    | ...     | >       | Search: #8 and #11 and #15                     | 54      | 23:42:30 |
| #15    | ...     | >       | Search: #12 or #13 or #14                      | 90,318  | 23:42:21 |
| #14    | ...     | >       | Search: perimenopause                          | 5,260   | 23:42:10 |
| #13    | ...     | >       | Search: menopause                              | 85,660  | 23:41:59 |
| #12    | ...     | >       | Search: climacteric                            | 75,952  | 23:41:50 |
| #11    | ...     | >       | Search: #9 or #10                              | 528,848 | 23:41:39 |
| #10    | ...     | >       | Search: depressive disorder                    | 137,060 | 23:41:26 |
| #9     | ...     | >       | Search: depression                             | 528,848 | 23:41:16 |
| #8     | ...     | >       | Search: #1 or #2 or #3 or #4 or #5 or #6 or #7 | 34,804  | 23:41:05 |
| #7     | ...     | >       | Search: acupoint                               | 11,687  | 23:40:54 |
| #6     | ...     | >       | Search: acupuncture point                      | 10,537  | 23:40:42 |
| #5     | ...     | >       | Search: auricular acupuncture                  | 1,449   | 23:40:26 |
| #4     | ...     | >       | Search: manual acupuncture                     | 1,167   | 23:40:13 |
| #3     | ...     | >       | Search: electropuncture                        | 71      | 23:40:03 |
| #2     | ...     | >       | Search: acupuncture                            | 34,389  | 23:39:50 |
| #1     | ...     | >       | Search: acupuncture[MeSH Terms]                | 25,965  | 23:39:31 |

Showing 1 to 16 of 16 entries

**Appendix 2. Valid outcome measures at different timepoint in each study**

| Author, year          | Type of outcome measures | Pre-treatment       | Post-treatment      | Follow-up |
|-----------------------|--------------------------|---------------------|---------------------|-----------|
| Wang et al 2015 [35]  | Depression               | SDS                 | SDS                 | SDS       |
|                       | Perimenopausal symptoms  | MENQOL              | MENQOL              | MENQOL    |
| Li 2015a [36]         | Depression               | HAMD                | HAMD                | HAMD      |
|                       | Perimenopausal symptoms  | MENQOL, FSH, E2, LH | MENQOL, FSH, E2, LH | MENQOL    |
| Li et al 2018 [37]    | Depression               | HAMD                | HAMD                | HAMD      |
|                       | Perimenopausal symptoms  | MENQOL, FSH, E2, LH | MENQOL, FSH, E2, LH | MENQOL    |
| Chi et al 2011 [30]   | Depression               | HAMD                | HAMD                | /         |
| Deng 2008 [38]        | Depression               | HAMD                | HAMD                | HAMD      |
|                       | Perimenopausal symptoms  | KI                  | KI                  | KI        |
| Dong 2015 [39]        | Depression               | HAMD                | HAMD                | /         |
| Li 2015b [40]         | Depression               | HAMD                | HAMD                | HAMD      |
|                       | Perimenopausal symptoms  | KI                  | KI                  | /         |
| Ma et al 2009 [41]    | Depression               | HAMD                | HAMD                | /         |
| Niu et al 2017 [42]   | Depression               | HAMD                | HAMD                | /         |
| Qian et al 2007 [43]  | Depression               | HAMD                | HAMD                | /         |
| Qiang 2008 [44]       | Depression               | HAMD                | HAMD                | /         |
| Shi et al 2018 [45]   | Depression               | HAMD                | HAMD                | HAMD      |
| Sun et al 2015 [46]   | Depression               | HAMD                | HAMD                | /         |
| Wang et al 2010 [47]  | Depression               | HAMD                | HAMD                | HAMD      |
| Zhang 2010 [48]       | Depression               | HAMD                | HAMD                | /         |
|                       | Perimenopausal symptoms  | KI, FSH, E2, LH     | KI, FSH, E2, LH     | /         |
| Zhang 2013 [49]       | Depression               | HAMD                | HAMD                | /         |
|                       | Perimenopausal symptoms  | FSH, E2, LH         | FSH, E2, LH         | /         |
| Zheng et al 2010 [50] | Depression               | HAMD                | HAMD                | HAMD      |
|                       | Perimenopausal symptoms  | KI, FSH, E2, LH     | KI, FSH, E2, LH     | KI        |
| Ding et al 2007 [51]  | Depression               | HAMD                | HAMD                | /         |
|                       | Perimenopausal symptoms  | KI                  | KI                  | /         |
| Li et al 2020 [52]    | Depression               | HAMD                | HAMD                | /         |
| Zhang 2015 [53]       | Depression               | HAMD                | HAMD                | HAMD      |
| Xing 2011 [54]        | Depression               | HAMD                | HAMD                | /         |
| Zhou et al 2007 [31]  | Depression               | HAMD                | HAMD                | /         |
| Ma et al 2011 [55]    | Depression               | HAMD                | HAMD                | /         |
| Liu et al 2019 [56]   | Depression               | HAMD                | HAMD                | /         |
|                       | Perimenopausal symptoms  | FSH, E2             | FSH, E2             | /         |
| Ning 2015 [57]        | Depression               | HAMD                | HAMD                | /         |

**Abbreviations:** HAMD, Hamilton Depression Scale; SDS, Self-Rating Depression Scale; KI, Kupperman Index; MENQOL, Menopause-Specific Quality of Life; FSH, follicle stimulating hormone; LH, luteinizing hormone; E2, estradiol

### Appendix 3. Risk of bias graph

|                  | Random sequence generation (selection bias) | Allocation concealment (selection bias) | Blinding of participants and personnel (performance bias) | Blinding of outcome assessment (detection bias) | Incomplete outcome data (attrition bias) | Selective reporting (reporting bias) | Other bias |
|------------------|---------------------------------------------|-----------------------------------------|-----------------------------------------------------------|-------------------------------------------------|------------------------------------------|--------------------------------------|------------|
| Chi et al 2011   | ?                                           | ?                                       | +                                                         | ?                                               | +                                        | ?                                    | +          |
| Deng 2008        | +                                           | ?                                       | +                                                         | ?                                               | +                                        | ?                                    | +          |
| Ding et al 2007  | ?                                           | ?                                       | +                                                         | ?                                               | +                                        | ?                                    | +          |
| Dong 2015        | ?                                           | ?                                       | +                                                         | ?                                               | +                                        | ?                                    | +          |
| Li 2015a         | +                                           | +                                       | +                                                         | +                                               | +                                        | ?                                    | +          |
| Li 2015b         | ?                                           | ?                                       | +                                                         | ?                                               | +                                        | ?                                    | +          |
| Li et al 2018    | +                                           | +                                       | +                                                         | +                                               | +                                        | +                                    | +          |
| Li et al 2020    | +                                           | ?                                       | +                                                         | ?                                               | +                                        | ?                                    | +          |
| Liu et al 2019   | +                                           | ?                                       | +                                                         | ?                                               | +                                        | ?                                    | +          |
| Ma et al 2009    | ?                                           | ?                                       | +                                                         | ?                                               | +                                        | ?                                    | +          |
| Ma et al 2011    | ?                                           | ?                                       | +                                                         | ?                                               | +                                        | ?                                    | +          |
| Ning 2015        | +                                           | ?                                       | +                                                         | ?                                               | +                                        | ?                                    | +          |
| Niu et al 2017   | +                                           | ?                                       | +                                                         | ?                                               | +                                        | ?                                    | +          |
| Qian et al 2007  | +                                           | ?                                       | +                                                         | ?                                               | +                                        | ?                                    | +          |
| Qiang 2008       | +                                           | ?                                       | +                                                         | ?                                               | +                                        | ?                                    | +          |
| Shi et al 2018   | ?                                           | ?                                       | +                                                         | ?                                               | +                                        | ?                                    | +          |
| Sun et al 2015   | ?                                           | ?                                       | +                                                         | ?                                               | +                                        | ?                                    | +          |
| Wang et al 2010  | +                                           | ?                                       | +                                                         | ?                                               | +                                        | ?                                    | +          |
| Wang et al 2015  | +                                           | ?                                       | +                                                         | ?                                               | +                                        | ?                                    | +          |
| Xing 2011        | +                                           | ?                                       | +                                                         | ?                                               | +                                        | ?                                    | +          |
| Zhang 2010       | +                                           | ?                                       | +                                                         | ?                                               | +                                        | ?                                    | +          |
| Zhang 2013       | ?                                           | ?                                       | +                                                         | ?                                               | +                                        | ?                                    | +          |
| Zhang 2015       | ?                                           | ?                                       | +                                                         | ?                                               | +                                        | ?                                    | +          |
| Zheng et al 2010 | +                                           | ?                                       | +                                                         | ?                                               | +                                        | ?                                    | +          |
| Zhou et al 2007  | +                                           | ?                                       | +                                                         | ?                                               | +                                        | ?                                    | +          |

**Notes:** other bias are assessed based on baseline balance

#### Appendix 4. Methodological quality assessment of 25 included RCTs

| Author, year          | Random sequence generation | Allocation concealment | Blinding of participants | Blinding of personnel | Blinding of outcome assessment | Incomplete outcome data | Selective outcome reporting | Other bias (baseline balance) | Other bias (funding or conflict of interest) |
|-----------------------|----------------------------|------------------------|--------------------------|-----------------------|--------------------------------|-------------------------|-----------------------------|-------------------------------|----------------------------------------------|
| Wang et al 2015 [35]  | L                          | U                      | U                        | H                     | U                              | L                       | U                           | L                             | L                                            |
| Li 2015a [36]         | L                          | L                      | L                        | H                     | L                              | L                       | U                           | L                             | L                                            |
| Li et al 2018 [37]    | L                          | L                      | H                        | H                     | L                              | L                       | L                           | L                             | L                                            |
| Chi et al 2011 [30]   | U                          | U                      | H                        | H                     | U                              | L                       | U                           | L                             | U                                            |
| Deng 2008 [38]        | L                          | U                      | H                        | H                     | U                              | L                       | U                           | L                             | U                                            |
| Dong 2015 [39]        | U                          | U                      | H                        | H                     | U                              | L                       | U                           | L                             | L                                            |
| Li 2015b [40]         | U                          | U                      | H                        | H                     | U                              | L                       | U                           | L                             | U                                            |
| Ma et al 2009 [41]    | U                          | U                      | H                        | H                     | U                              | L                       | U                           | L                             | U                                            |
| Niu et al 2017 [42]   | L                          | U                      | H                        | H                     | U                              | L                       | U                           | L                             | U                                            |
| Qian et al 2007 [43]  | L                          | U                      | H                        | H                     | U                              | L                       | U                           | L                             | U                                            |
| Qiang 2008 [44]       | L                          | U                      | H                        | H                     | U                              | L                       | U                           | L                             | U                                            |
| Shi et al 2018 [45]   | U                          | U                      | H                        | H                     | U                              | L                       | U                           | L                             | L                                            |
| Sun et al 2015 [46]   | U                          | U                      | H                        | H                     | U                              | L                       | U                           | L                             | L                                            |
| Wang et al 2010 [47]  | L                          | U                      | H                        | H                     | U                              | L                       | U                           | L                             | L                                            |
| Zhang 2010 [48]       | L                          | U                      | H                        | H                     | U                              | H                       | U                           | L                             | U                                            |
| Zhang 2013 [49]       | U                          | U                      | H                        | H                     | U                              | L                       | U                           | L                             | U                                            |
| Zheng et al 2010 [50] | L                          | U                      | H                        | H                     | U                              | L                       | U                           | L                             | U                                            |
| Ding et al 2007 [51]  | U                          | U                      | H                        | H                     | U                              | L                       | U                           | L                             | U                                            |
| Li et al 2020 [52]    | L                          | U                      | H                        | H                     | U                              | L                       | U                           | L                             | U                                            |
| Zhang 2015 [53]       | U                          | U                      | H                        | H                     | U                              | L                       | U                           | L                             | U                                            |
| Xing 2011 [54]        | L                          | U                      | H                        | H                     | U                              | L                       | U                           | L                             | U                                            |

|                      |   |   |   |   |   |   |   |   |   |
|----------------------|---|---|---|---|---|---|---|---|---|
| Zhou et al 2007 [31] | L | U | H | H | U | L | U | L | L |
| Ma et al 2011 [55]   | U | U | H | H | U | L | U | L | U |
| Liu et al 2019 [56]  | L | U | H | H | U | L | U | L | U |
| Ning 2015 [57]       | L | U | H | H | U | L | U | L | U |

**Abbreviations:** L, Low risk; U, Unclear risk; H, High risk.

### Appendix 5. Details of acupuncture procedure based on revised STRICTA (2010 Version)

| Item of STRICTA                     | 1. Acupuncture rationale                                                     |                                                                              |                                           | 2. Needling details                                                          |                                                                              |                                                                  |                                                                              |                                                                              |                                                                              |                                                                           | 3. Treatment regimen                                                         |                                                                              | 4. Other components of treatment                                          |                                       | 5. Practitioner background   | 6. Control or comparator interventions                                       |                                                                              |
|-------------------------------------|------------------------------------------------------------------------------|------------------------------------------------------------------------------|-------------------------------------------|------------------------------------------------------------------------------|------------------------------------------------------------------------------|------------------------------------------------------------------|------------------------------------------------------------------------------|------------------------------------------------------------------------------|------------------------------------------------------------------------------|---------------------------------------------------------------------------|------------------------------------------------------------------------------|------------------------------------------------------------------------------|---------------------------------------------------------------------------|---------------------------------------|------------------------------|------------------------------------------------------------------------------|------------------------------------------------------------------------------|
|                                     | (1a) Style of acupuncture                                                    | (1b) Rationale for treatment                                                 | (1c) Extent to which treatment was varied | (2a) Number of needles inserted                                              | (2b) points used                                                             | (2c) Depths of insertion                                         | (2d) Responses elicited                                                      | (2e) Needle stimulation                                                      | (2f) Needle retention time                                                   | (2g) Needle type                                                          | (3a) Number of treatment sessions                                            | (3b) Frequency and duration of treatment sessions                            | (4a) Details of other interventions administered to the acupuncture group | (4b) Setting and context of treatment | Description of acupuncturist | (6a) Rationale for the control or comparator                                 | (6b) Precise description of the control or comparator                        |
| Studies eligible to the items       | [30,31,35,36,37,38,39,40,41,42,43,44,45,46,47,48,49,50,51,52,53,54,55,56,57] | [30,31,35,36,37,38,39,40,41,42,43,44,45,46,47,48,49,50,51,52,53,54,55,56,57] | /                                         | [30,31,35,36,37,38,39,40,41,42,43,44,45,46,47,48,49,50,51,52,53,54,55,56,57] | [30,31,35,36,37,38,39,40,41,42,43,44,45,46,47,48,49,50,51,52,53,54,55,56,57] | [30,31,36,40,41,42,43,44,45,46,47,48,49,50,51,52,53,54,55,56,57] | [30,31,35,36,37,38,39,40,41,42,43,44,45,46,47,48,49,50,51,52,53,54,55,56,57] | [30,31,35,36,37,38,39,40,41,42,43,44,45,46,47,48,49,50,51,52,53,54,55,56,57] | [30,31,35,36,37,38,39,40,41,42,43,44,45,46,47,48,49,50,51,52,53,54,55,56,57] | [30,31,36,37,38,39,40,41,42,43,44,45,46,47,48,49,50,51,52,53,54,55,56,57] | [30,31,35,36,37,38,39,40,41,42,43,44,45,46,47,48,49,50,51,52,53,54,55,56,57] | [30,31,35,36,37,38,39,40,41,42,43,44,45,46,47,48,49,50,51,52,53,54,55,56,57] | [55,56,57]                                                                | /                                     | [38]                         | [30,31,35,36,37,38,39,40,41,42,43,44,45,46,47,48,49,50,51,52,53,54,55,56,57] | [30,31,35,36,37,38,39,40,41,42,43,44,45,46,47,48,49,50,51,52,53,54,55,56,57] |
| Total number and percentage [n (%)] | 25 (100)                                                                     | 25 (100)                                                                     | 0 (0)                                     | 25 (100)                                                                     | 25 (100)                                                                     | 16 (64)                                                          | 25 (100)                                                                     | 25 (100)                                                                     | 25 (100)                                                                     | 21 (84)                                                                   | 25 (100)                                                                     | 25 (100)                                                                     | 3 (12)                                                                    | 0 (0)                                 | 1 (4)                        | 25 (100)                                                                     | 25 (100)                                                                     |
| Wang et al 2015 [35]                | Chinese Acup                                                                 | TCM theory                                                                   | NR                                        | Reported                                                                     | KI6, LU7, PC6, SP4                                                           | NR                                                               | De-qi                                                                        | MA                                                                           | 30 min                                                                       | NR                                                                        | 8 weeks                                                                      | 30 min/day, 3 days/week                                                      | NR                                                                        | NR                                    | NR                           | Sham-MA                                                                      | Reported (details in Table 1)                                                |
| Li 2015a [36]                       | Chinese Acup                                                                 | TCM theory                                                                   | NR                                        | Reported                                                                     | CV4, EX-CA1, EX-HN3, GV20, LI4, LR3, SP6, ST25                               | 0.5-1 <i>cun</i>                                                 | De-qi                                                                        | EA                                                                           | 30 min                                                                       | stainless steel (0.3*25 mm for                                            | 12 weeks                                                                     | 30 min/day, 3 days/week                                                      | NR                                                                        | NR                                    | NR                           | Sham-EA, Escitalopram                                                        | Reported (details in Table 1)                                                |

|                        |              |            |    |          |                                                                                                                        |                  |              |    |           |                                                                                                                   |          |                                                                                                  |    |    |                                        |                            |                                  |
|------------------------|--------------|------------|----|----------|------------------------------------------------------------------------------------------------------------------------|------------------|--------------|----|-----------|-------------------------------------------------------------------------------------------------------------------|----------|--------------------------------------------------------------------------------------------------|----|----|----------------------------------------|----------------------------|----------------------------------|
|                        |              |            |    |          |                                                                                                                        |                  |              |    |           | EX-HN3 and GV20;<br>0.3*40 mm for LI4,<br>LR3 and SP6,<br>0.3*50 mm for CV4<br>and EX-CA1; 0.3*75<br>mm for ST25) |          |                                                                                                  |    |    |                                        |                            |                                  |
| Li et al<br>2018 [37]  | Chinese Acup | TCM theory | NR | Reported | CV4, EX-CA1, EX-HN3,<br>GV20, LI4, LR3, SP6, ST25                                                                      | NR               | <i>De-qi</i> | EA | 30 min    | stainless steel<br>(0.3*25 mm, 0.3*40<br>mm and 0.3*50<br>mm)                                                     | 12 weeks | 30 min/day, 3<br>days/week                                                                       | NR | NR | acupuncture<br>experience ><br>5 years | Escitalopram               | Reported (details<br>in Table 1) |
| Chi et al<br>2011 [30] | Chinese Acup | TCM theory | NR | Reported | EX-HN1, EX-HN3, GV20,<br>KI3, LR3, LR14, SP6, ST36                                                                     | 0.5-1 <i>cun</i> | <i>De-qi</i> | MA | 30 min    | stainless steel<br>(0.35*40 mm)                                                                                   | 4 weeks  | 30 min/day                                                                                       | NR | NR | NR                                     | Fluoxetine                 | Reported (details<br>in Table 1) |
| Deng 2008<br>[38]      | Chinese Acup | TCM theory | NR | Reported | CV3, CV4, CV6, CV10,<br>CV12, KI17, Qipang (0.5<br>Cun beside CV6),<br>Xiafengshidian (1 Cun<br>below and beside ST26) | NR               | <i>De-qi</i> | MA | 20-30 min | stainless steel<br>(0.22*30 mm and<br>0.22*40 mm)                                                                 | 4 weeks  | 20-30 min/day,<br>after 3<br>consecutive days<br>of treatment,<br>once treatment<br>every 3 days | NR | NR | NR                                     | Deanxit                    | Reported (details<br>in Table 1) |
| Dong 2015<br>[39]      | Chinese Acup | TCM theory | NR | Reported | BL13, BL15, BL17, BL18,<br>BL20, BL21, BL23                                                                            | NR               | <i>De-qi</i> | MA | 30 min    | stainless steel<br>(0.3*50 mm)                                                                                    | 30 days  | 30 min/day                                                                                       | NR | NR | NR                                     | Nilestriol +<br>Fluoxetine | Reported (details<br>in Table 1) |
| Li 2015b<br>[40]       | Chinese Acup | TCM theory | NR | Reported | BL15, BL18, BL23, EX-HN1,<br>EX-HN3, GV20, GV24, PC6                                                                   | 0.5-1 <i>cun</i> | <i>De-qi</i> | MA | 30 min    | stainless steel<br>(0.3*25 mm, 0.3*40<br>mm and 0.3*50<br>mm)                                                     | 12 weeks | 30 min/day, 6<br>days/week                                                                       | NR | NR | NR                                     | Fluoxetine                 | Reported (details<br>in Table 1) |
| Ma et al<br>2009 [41]  | Chinese Acup | TCM theory | NR | Reported | EX-HN1, EX-HN3, GV20,<br>HT7, PC6, PC7, SP6, ST36                                                                      | 0.5-1 <i>cun</i> | <i>De-qi</i> | MA | 30 min    | stainless steel<br>(0.35*40 mm)                                                                                   | 8 weeks  | 30 min/day, 5<br>days/week                                                                       | NR | NR | NR                                     | Fluoxetine                 | Reported (details<br>in Table 1) |



|                         |              |            |    |          |                                                   |                    |       |    |        |                                                                                                                                                         |          |                            |    |    |    |              |                                  |
|-------------------------|--------------|------------|----|----------|---------------------------------------------------|--------------------|-------|----|--------|---------------------------------------------------------------------------------------------------------------------------------------------------------|----------|----------------------------|----|----|----|--------------|----------------------------------|
| Niu et al<br>2017 [42]  | Chinese Acup | TCM theory | NR | Reported | BL13, BL15, BL17, BL18,<br>BL20, BL23             | 17mm-27mm          | De-qi | MA | 30 min | stainless steel<br>(0.25*25 mm for<br>BL13, BL15, BL17,<br>BL18, BL20; 0.25*40<br>mm for BL23)                                                          | 6 weeks  | 30 min/day, 5<br>days/week | NR | NR | NR | Fluoxetine   | Reported (details<br>in Table 1) |
| Qian et al<br>2007 [43] | Chinese Acup | TCM theory | NR | Reported | BL13, BL15, BL17, BL18,<br>BL20, BL23             | 0.5-0.8 <i>cun</i> | De-qi | MA | 25 min | stainless steel<br>(0.35*25 mm)                                                                                                                         | 6 weeks  | 25 min/day, 5<br>days/week | NR | NR | NR | Fluoxetine   | Reported (details<br>in Table 1) |
| Qiang<br>2008 [44]      | Chinese Acup | TCM theory | NR | Reported | BL15, BL18, BL23,EX-HN1,<br>GB20                  | 0.5-0.8 <i>cun</i> | De-qi | MA | 25 min | stainless steel<br>(0.35*25 mm)                                                                                                                         | 6 weeks  | 25 min/day, 5<br>days/week | NR | NR | NR | Fluoxetine   | Reported (details<br>in Table 1) |
| Shi et al<br>2018 [45]  | Chinese Acup | TCM theory | NR | Reported | CV4, EX-CA1, EX-HN3,<br>GV20, LI4, LR3, SP6, ST25 | 0.5-1 <i>cun</i>   | De-qi | EA | 30 min | stainless steel<br>(0.3*25 mm for<br>EX-HN3 and GV20;<br>0.3*40 mm for LI4,<br>LR3 and SP6,;<br>0.3*50 mm for CV4<br>and EX-CA1; 0.3*75<br>mm for ST25) | 12 weeks | 30 min/day, 3<br>days/week | NR | NR | NR | Escitalopram | Reported (details<br>in Table 1) |
| Sun et al<br>2015 [46]  | Chinese Acup | TCM theory | NR | Reported | CV4, EX-CA1, EX-HN3,<br>GV20, LI4, LR3, SP6, ST25 | 0.5-1 <i>cun</i>   | De-qi | EA | 30 min | stainless steel<br>(0.3*25 mm for<br>EX-HN3 and GV20;<br>0.3*40 mm for LI4,<br>LR3 and SP6,;<br>0.3*50 mm for CV4<br>and EX-CA1; 0.3*75<br>mm for ST25) | 12 weeks | 30 min/day, 3<br>days/week | NR | NR | NR | Escitalopram | Reported (details<br>in Table 1) |
| Wang et al              | Chinese Acup | TCM theory | NR | Reported | CV3, CV4, CV6, CV10,                              | NR                 | De-qi | MA | 30 min | stainless steel                                                                                                                                         | 4 weeks  | 30 min/day, after          | NR | NR | NR | Deanxit      | Reported (details                |

|                       |              |            |    |          |                                                        |                    |              |    |                                                                          |                              |          |                                                              |    |    |    |                                 |                               |
|-----------------------|--------------|------------|----|----------|--------------------------------------------------------|--------------------|--------------|----|--------------------------------------------------------------------------|------------------------------|----------|--------------------------------------------------------------|----|----|----|---------------------------------|-------------------------------|
| 2010 [47]             |              |            |    |          | CV12, KI17                                             |                    |              |    |                                                                          | (0.22*30 mm and 0.22*40 mm)  |          | 3 consecutive days of treatment, once treatment every 3 days |    |    |    |                                 | in Table 1)                   |
| Zhang 2010 [48]       | Chinese Acup | TCM theory | NR | Reported | BL13, BL15, BL17, BL20, BL23, GV20, KI3, LR3, PC6, SP6 | NR                 | <i>De-qi</i> | EA | 30 min                                                                   | stainless steel (0.25*40 mm) | 12 weeks | 30 min/day, 5 days/week                                      | NR | NR | NR | Nilestriol+ Fluoxetine          | Reported (details in Table 1) |
| Zhang 2013 [49]       | Chinese Acup | TCM theory | NR | Reported | EX-HN1, GB13, GV20, GV24, HT7                          | 13-25mm            | <i>De-qi</i> | MA | 30 min                                                                   | NR                           | 12 weeks | 30 min/day, 7 days/week                                      | NR | NR | NR | Premarin + Provera + Fluoxetine | Reported (details in Table 1) |
| Zheng et al 2010 [50] | Chinese Acup | TCM theory | NR | Reported | BL8, BL18, BL23, GV19, GV21, KI3, LR3, SP6             | 1.5 <i>cun</i>     | <i>De-qi</i> | MA | 30 min (needle retaining time for 8 hour in BL8, GV19, GV21 per session) | stainless steel (0.3*50 mm)  | 12 weeks | 30 min/day, 7 days/week                                      | NR | NR | NR | Premarin + Provera + Fluoxetine | Reported (details in Table 1) |
| Ding et al 2007 [51]  | Chinese Acup | TCM theory | NR | Reported | BL15, BL18, BL20, BL23, GV20, HT7, LR3, SP6            | 0.5-1.5 <i>cun</i> | <i>De-qi</i> | MA | 30 min                                                                   | stainless steel (0.35*40 mm) | 4 weeks  | 30 min/day, 6 days/week                                      | NR | NR | NR | Fluoxetine                      | Reported (details in Table 1) |
| Li et al 2020 [52]    | Chinese Acup | TCM theory | NR | Reported | EX-HN1, EX-HN3, GV20, HT7, LI4, PC6, SP6, ST36         | 0.3-0.5 <i>cun</i> | <i>De-qi</i> | EA | 25 min                                                                   | stainless steel (0.25*40 mm) | 6 weeks  | 25 min/day, 3 days/week                                      | NR | NR | NR | Fluoxetine                      | Reported (details in Table 1) |
| Zhang 2015 [53]       | Chinese Acup | TCM theory | NR | Reported | CV3, CV4, CV6, CV10, CV12, KI17                        | NR                 | <i>De-qi</i> | MA | 30 min                                                                   | NR                           | 4 weeks  | 30 min/day, after 3 consecutive days of treatment, once      | NR | NR | NR | Deanxit                         | Reported (details in Table 1) |

|                         |              |            |    |          |                                                              |                    |              |    |        |                                                 |          |                            |    |    |    |                            |                                  |
|-------------------------|--------------|------------|----|----------|--------------------------------------------------------------|--------------------|--------------|----|--------|-------------------------------------------------|----------|----------------------------|----|----|----|----------------------------|----------------------------------|
|                         |              |            |    |          |                                                              |                    |              |    |        |                                                 |          | treatment every<br>3 days  |    |    |    |                            |                                  |
| Xing 2011<br>[54]       | Chinese Acup | TCM theory | NR | Reported | GV26, PC5                                                    | 0.5 <i>cun</i>     | <i>De-qi</i> | MA | 20 min | stainless steel<br>(0.35*25 mm)                 | 6 weeks  | 20 min/day, 7<br>days/week | NR | NR | NR | Fluoxetine                 | Reported (details<br>in Table 1) |
| Zhou et al<br>2007 [31] | Chinese Acup | TCM theory | NR | Reported | BL15, BL18, BL23, EX-HN1,<br>GB13, GV24, SP6, ST36           | 18-30mm            | <i>De-qi</i> | MA | 30 min | stainless steel<br>(0.3*25 mm and<br>0.3*40 mm) | 6 weeks  | 30 min/day, 6<br>days/week | NR | NR | NR | Fluoxetine                 | Reported (details<br>in Table 1) |
| Ma et al<br>2011 [55]   | Chinese Acup | TCM theory | NR | Reported | EX-HN3, GV20, LI4, PC6,<br>ST36                              | NR                 | <i>De-qi</i> | EA | 45 min | NR                                              | 6 weeks  | 45 min/day, 7<br>days/week | NR | NR | NR | Paroxetine                 | Reported (details<br>in Table 1) |
| Liu et al<br>2019 [56]  | Chinese Acup | TCM theory | NR | Reported | BL23, CV4, HT7, KI3, LI4,<br>LR3, SP6                        | NR                 | <i>De-qi</i> | MA | 30 min | stainless steel<br>(0.3*40 mm)                  | 12 weeks | 30 min/day, 3<br>days/week | NR | NR | NR | Sertraline                 | Reported (details<br>in Table 1) |
| Ning 2015<br>[57]       | Chinese Acup | TCM theory | NR | Reported | BL13, BL15, BL18, BL20,<br>BL23, GV20, HT7, KI3, LI4,<br>LR3 | 0.5-1.2 <i>cun</i> | <i>De-qi</i> | MA | 30 min | stainless steel<br>(0.3*40 mm)                  | 12 weeks | 30 min/day, 7<br>days/week | NR | NR | NR | Nilestriol +<br>Fluoxetine | Reported (details<br>in Table 1) |

**Abbreviations:** NR, no record; Acup, acupuncture; TCM, Traditional Chinese Medicine; MA, manual acupuncture; EA, electroacupuncture; BL8, Luoque; BL13, Feishu; BL15, Xinshu; BL17, Geshu; BL18, Ganshu; BL20, Pishu; BL21, Weishu; BL23, Shenshu; CV3, Zhongji; CV4, Guanyuan; CV6, Qihai; CV10, Xiawan; CV12, Zhongwan; EX-CA1, Zigong; EX-HN1, Sishencong; EX-HN3, Yintang; GB13, Benshen; GV19, Houding; GV20, Baihui; GV21, Qianting; GV24, Shenting; GV26, Shuigou; HT7, Shenmen; KI6, Zhaohai; KI3, Taixi; KI13, Qixue; KI17, Shangqu; LI4, Hegu; LR3, Taichong; LR14, LU7, Lieque; Qimen; PC5, Jianshi; PC6, Neiguan; PC7, Daling; SP4, Gongsun; SP6, Sanyinjiao; ST25, Tianshu; ST26, Wailing; ST36, Zusanli; *De-qi* (obtaining Qi) refers to acupuncture-evoked specific sensations such as soreness, numbness, heaviness, and distention at the site of needle placement, and these sensations may spread to other parts of the body

**Appendix 6. Qualitative and quantitative analysis in the 25 included studies**

| Interventions VS. controls                                                                                              | Number of studies | Qualitative analysis | Quantitative analysis                                                                                                                                                                                                                              |                   |                      |                          | Publication bias                                                  |
|-------------------------------------------------------------------------------------------------------------------------|-------------------|----------------------|----------------------------------------------------------------------------------------------------------------------------------------------------------------------------------------------------------------------------------------------------|-------------------|----------------------|--------------------------|-------------------------------------------------------------------|
|                                                                                                                         |                   |                      | pooled effect sizes                                                                                                                                                                                                                                | subgroup analysis | sensitivity analysis | meta-regression analysis |                                                                   |
| Acup. VS. sham Acup.                                                                                                    | 2                 | All                  | /                                                                                                                                                                                                                                                  | /                 | /                    | /                        | HAMD: 24 studies (one out of 25 studies used SDS instead of HAMD) |
| Acup. VS. antidepressant or antidepressant combined with HRT                                                            | 21                | All                  | (i) HAMD: 21 studies<br>(ii) HAMD (2-week follow-up): 3 studies<br>(iii) HAMD (4-week follow-up): 6 studies<br>(iv) HAMD (12-week follow-up): 3 studies<br>(v) KI: 5 studies<br>(vi) FSH: 5 studies<br>(vii) E2: 5 studies<br>(viii) LH: 5 studies | HAMD              | HAMD                 | HAMD                     |                                                                   |
| acupuncture + antidepressant or antidepressant combined with HRT VS. antidepressant or antidepressant combined with HRT | 3                 | All                  | (i) HAMD: 3 studies                                                                                                                                                                                                                                | /                 | /                    | /                        |                                                                   |

**Abbreviations:** Acup., acupuncture; HRT, hormone replacement therapy; HAMD, Hamilton Depression Scale; KI, Kupperman index; FSH, follicle stimulating hormone; LH, Luteinizing hormone; E2, estradiol

**Appendix 7. Subgroup analyses of HAMD and KI (Acupuncture Vs. Antidepressant/Antidepressant + HRT)**

| Basis for subgroup classification | All trials or subgroup title  | No. of Studies | No. of participants | Statistical method                        | Effect size          | <i>p</i> | <i>I</i> <sup>2</sup> | Subgroup analysis results                                |
|-----------------------------------|-------------------------------|----------------|---------------------|-------------------------------------------|----------------------|----------|-----------------------|----------------------------------------------------------|
| HAMD at post-treatment            | All trials                    | 21             | 1842                | Std. Mean Difference (IV, Random, 95% CI) | -0.54 [-0.91, -0.16] | < 0.01   | 93                    |                                                          |
| Acupuncture stimulations          | (i) MA                        | 15             | 1309                | Std. Mean Difference (IV< random, 95% CI) | -0.34 [-0.56, -0.12] | < 0.01   | 73                    | Chi <sup>2</sup> statistic 1.00, df = 1, <i>p</i> = 0.32 |
|                                   | (ii) EA                       | 6              | 533                 | Std. Mean Difference (IV< random, 95% CI) | -0.99 [-2.24, -0.26] | 0.12     | 97                    |                                                          |
| Type of standard care             | (i) Vs. antidepressant alone  | 17             | 1384                | Std. Mean Difference (IV, Random, 95% CI) | -0.57 [-1.05, -0.09] | 0.02     | 94                    | Chi <sup>2</sup> statistic 0.35, df = 1, <i>p</i> = 0.55 |
|                                   | (ii) Vs. antidepressant + HRT | 4              | 458                 | Std. Mean Difference (IV< random, 95% CI) | -0.39 [-0.73, -0.04] | 0.03     | 69                    |                                                          |
| HAMD at 4-week follow-up          | All trials                    | 6              | 504                 | Std. Mean Difference (IV< random, 95% CI) | -1.36 [-2.72, 0.00]  | 0.05     | 97                    |                                                          |
| Acupuncture stimulations          | (i) MA                        | 3              | 163                 | Std. Mean Difference (IV, Random, 95% CI) | -0.82 [-1.14, -0.49] | < 0.01   | 0                     | Chi <sup>2</sup> statistic 0.60, df = 1, <i>p</i> = 0.44 |
|                                   | (ii) EA                       | 3              | 341                 | Std. Mean Difference (IV< random, 95% CI) | -1.91 [-4.63, 0.82]  | 0.17     | 99                    |                                                          |
| KI                                | All trials                    | 5              | 410                 | Mean Difference (IV, Random, 95% CI)      | -2.80 [-5.60, -0.01] | 0.05     | 90                    |                                                          |
| Acupuncture stimulations          | (i) MA                        | 4              | 320                 | Mean Difference (IV< random, 95% CI)      | -3.34 [-7.25, 0.57]  | 0.09     | /                     | Chi <sup>2</sup> statistic 1.44, df = 1, <i>p</i> = 0.23 |
|                                   | (ii) EA                       | 1              | 90                  | Mean Difference (IV< random, 95% CI)      | -0.93 [-1.40, -0.46] | < 0.01   | 92                    |                                                          |

|                          |                               |   |     |                                           |                      |        |    |                                                          |
|--------------------------|-------------------------------|---|-----|-------------------------------------------|----------------------|--------|----|----------------------------------------------------------|
| Type of standard care    | (i) Vs. antidepressant alone  | 3 | 200 | Mean Difference (IV, Random, 95% CI)      | -4.55 [-8.46, -0.65] | 0.02   | 84 | Chi <sup>2</sup> statistic 3.34, df = 1, <i>p</i> < 0.07 |
|                          | (ii) Vs. antidepressant + HRT | 2 | 210 | Mean Difference (IV, Random, 95% CI)      | -0.89 [-1.34, -0.43] | < 0.01 | 0  |                                                          |
| Serum E2 levels          | All trials                    | 5 | 679 | Std. Mean Difference (IV, Random, 95% CI) | -0.30 [-0.77, 0.17]  | 0.22   | 89 |                                                          |
| Acupuncture stimulations | (i) MA                        | 2 | 308 | Std. Mean Difference (IV, Random, 95% CI) | -0.68 [-1.95, 0.59]  | 0.29   | 96 | Chi <sup>2</sup> statistic 0.97, df = 1, <i>p</i> = 0.32 |
|                          | (ii) EA                       | 3 | 371 | Std. Mean Difference (IV, Random, 95% CI) | -0.03 [-0.24, 0.17]  | 0.75   | 0  |                                                          |
| Type of standard care    | (i) Vs. antidepressant alone  | 2 | 281 | Std. Mean Difference (IV, Random, 95% CI) | 0.00 [-0.23, 0.24]   | 0.98   | 0  | Chi <sup>2</sup> statistic 1.43, df = 1, <i>p</i> = 0.23 |
|                          | (ii) Vs. antidepressant + HRT | 3 | 398 | Std. Mean Difference (IV, Random, 95% CI) | -0.50 [-1.30, 0.29]  | 0.22   | 93 |                                                          |

**Abbreviations:** MA, manual acupuncture; EA, electroacupuncture

## Appendix 8. Forest plot after removing a study that may be the potential source of heterogeneity

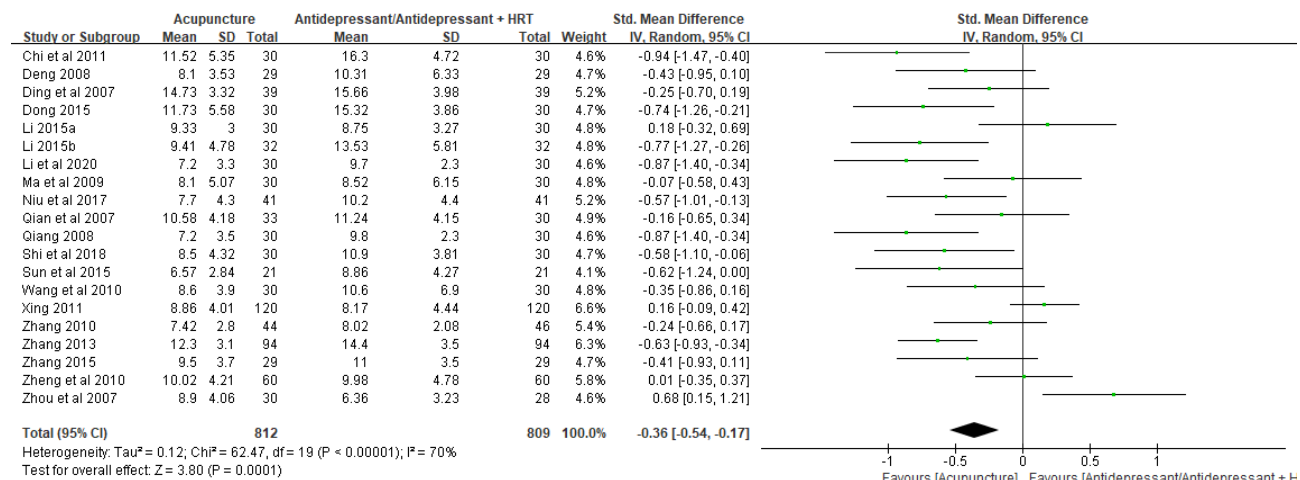

**Appendix 9. Figures of meta-regression**

**Supplemental Figure 1. Univariate meta-regression based on publication year as covariate**

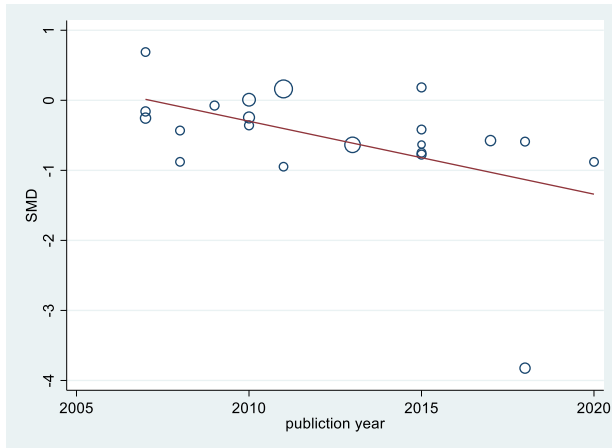

**Supplemental Figure 2. Univariate meta-regression based on study sample size as covariate**

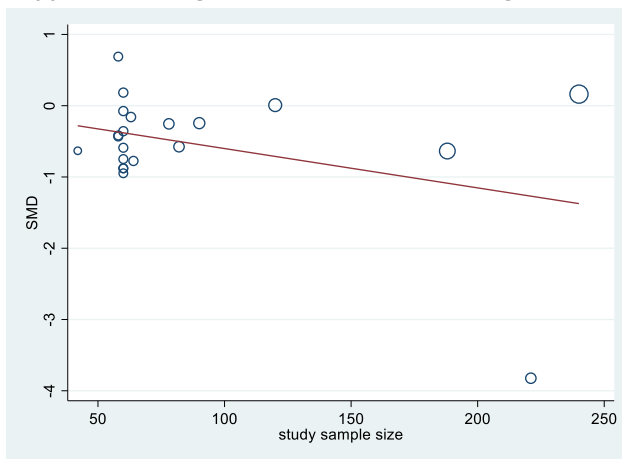

**Supplemental Figure 3. Univariate meta-regression based on acupuncture stimulation as covariate**

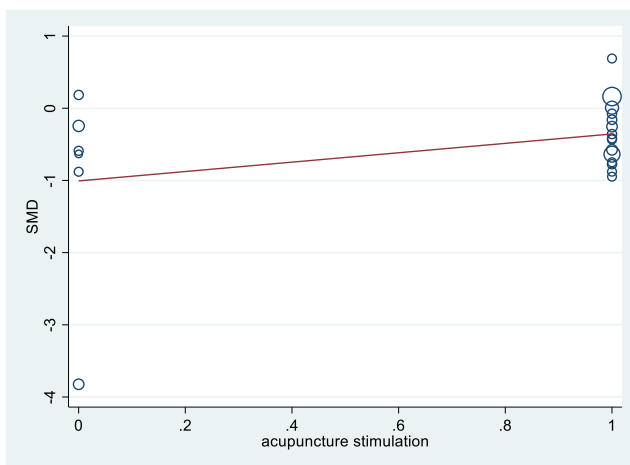



**Supplemental Figure 4. Univariate meta-regression based on standard care in control groups as covariate**

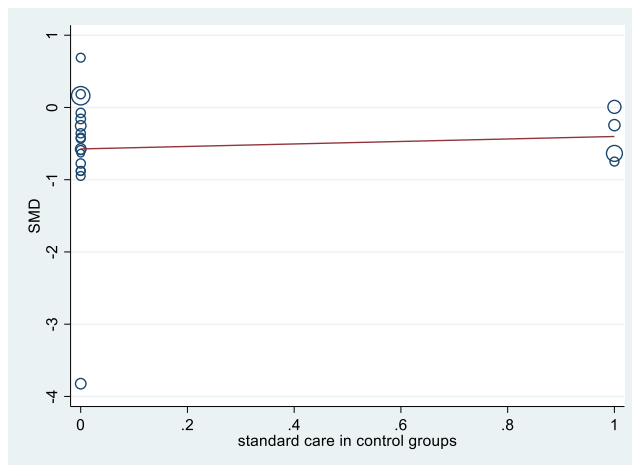

Supplement: Data_Sheet_1.pdf [file Data_Sheet_1.pdf]
